# Supplementary material for: The efficacy and safety of long- versus short-interval transarterial chemoembolization in unresectable hepatocellular carcinoma
Source: PubMed Central journal article supplement — J Cancer. 2018 Oct 16;9(21):4000–8. doi: 10.7150/jca.24250 (PMC6218788; doi:10.7150/jca.24250), 2018-10-16
Supplement: jcav09p4000s1.pdf [file jcav09p4000s1.pdf]

Supplementary table 1. Clinical characteristics of patients prior to the second TACE session

| Variables               |   | Short interval  | Long interval   | p     |
|-------------------------|---|-----------------|-----------------|-------|
|                         |   | (n = 238)       | (n = 238)       |       |
| <b>WBC, 10E9/L</b>      |   | 6.32 ± 1.98     | 6.26 ± 2.12     | 0.525 |
| <b>RBC, 10E9/L</b>      |   | 6.27 ± 31.56    | 4.28 ± 0.72     | 0.265 |
| <b>HB, g/L</b>          |   | 125.63 ± 19.22  | 125.40 ± 20.82  | 0.620 |
| <b>PLT, 10E9/L</b>      |   | 201.52 ± 113.94 | 186.89 ± 93.41  | 0.109 |
| <b>ALT, U/L</b>         |   | 50.03 ± 34.74   | 54.18 ± 68.58   | 0.205 |
| <b>AST, U/L</b>         |   | 77.72 ± 65.16   | 71.27 ± 65.95   | 0.065 |
| <b>GGT, U/L</b>         |   | 201.47 ± 144.17 | 190.21 ± 178.48 | 0.024 |
| <b>ALB, g/L</b>         |   | 37.38 ± 4.34    | 38.82 ± 5.78    | 0.013 |
| <b>TBIL, µmol/L</b>     |   | 15.08 ± 12.06   | 15.38 ± 10.17   | 0.398 |
| <b>Creatine, µmol/L</b> |   | 70.19 ± 16.71   | 69.19 ± 14.29   | 0.751 |
| <b>PT, sec</b>          |   | 12.58 ± 1.72    | 12.26 ± 1.53    | 0.114 |
| <b>INR</b>              |   | 1.09 ± 0.16     | 1.24 ± 1.74     | 0.247 |
| <b>Child-Pugh score</b> |   | 5.39 ± 0.672    | 5.31 ± 0.554    | 0.171 |
| <b>ABIL grade</b>       | 1 | 85 (35.71%)     | 108 (45.38%)    | 0.027 |
|                         | 2 | 149 (62.60%)    | 128 (53.78%)    |       |
|                         | 3 | 4 (1.68%)       | 2 (0.84%)       |       |

Values are presented as the median ±  $\chi$  and n (%)

Abbreviations: WBC, white blood cell; RBC, red blood cell; HB, hemoglobin; PLT, platelet; ALT, alanine transaminase; AST, aspartate aminotransferase; GGT, gamma-glutamyl transpeptidase; ALB, albumin; TBIL, total bilirubin; PT, prothrombin time; INR, international normalized ratio; TACE, transcatheter arterial chemoembolization; ABIL, Albumin-Bilirubin.

Supplementary table 2. Radiological responses according to mRECIST Criteria after first and second session TACE

|               | Group | CR          | PR           | SD          | PD          | p-value |
|---------------|-------|-------------|--------------|-------------|-------------|---------|
| <b>TACE-1</b> | LIG   | 12 (5.04%)  | 120 (50.42%) | 85 (35.71%) | 21 (8.82%)  | 0.547   |
|               | SIG   | 18 (7.56%)  | 120 (50.42%) | 79 (33.19%) | 21 (8.82%)  |         |
| <b>TACE-2</b> | LIG   | 19 (7.98%)  | 142 (59.66%) | 24 (10.08%) | 53 (22.27%) | 0.158   |
|               | SIG   | 24 (10.08%) | 133 (55.88%) | 40 (16.81%) | 41 (17.23%) |         |

TACE-1 or TACE-2, first or second session transarterial chemoembolization; mRECIST: The modified response evaluation criteria in solid tumors criterion; LIG = Long-interval group, SIG = Short-interval group, each group included 238 patients.

CR, complete response; PR, partial response; SD, stable disease; PD, progressive disease

## Supplement material

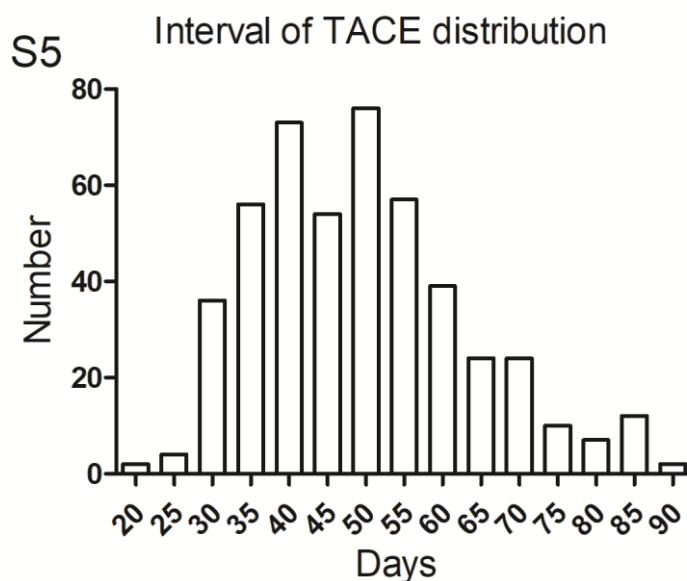

**Supplementary Figure 1.** Histograms of the distribution of interval between the first two TACE sessions.

## Supplementary Figure 2

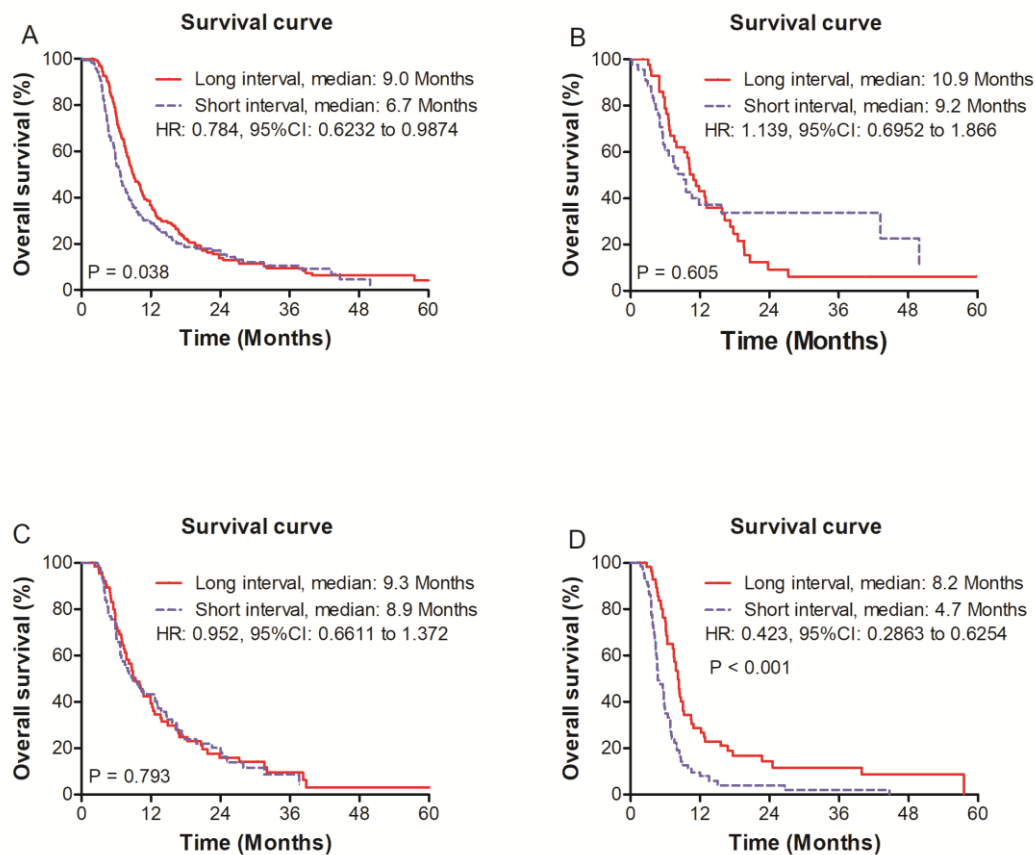

**Supplementary Figure 2.** Kaplan-Meier survival cures of Long- and short-interval in the patients treated with only two sessions of TACE: (A) Overall survival for Long- and short-interval in the patients treated with only two sessions of TACE, (B-D) for BCLC-A, -B and -C stage in the patients treated with only two sessions TACE.

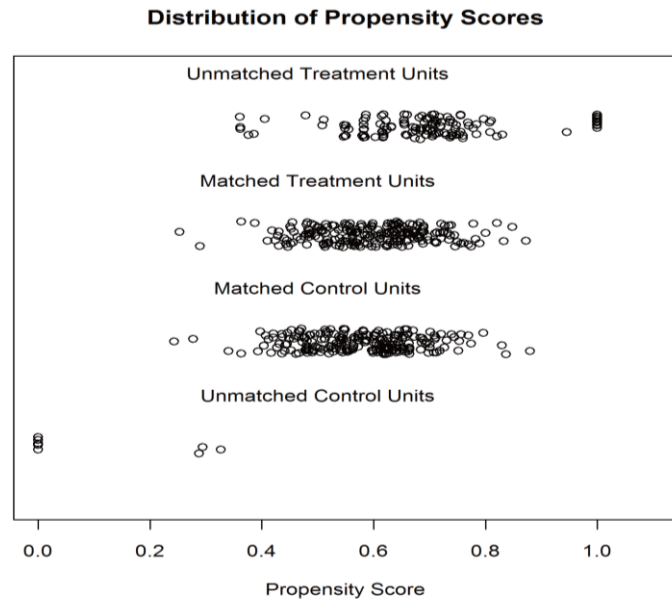

**Supplementary Figure 3.** Jitter plots of the propensity score for patients after resection and ablation in either matched or unmatched groups.

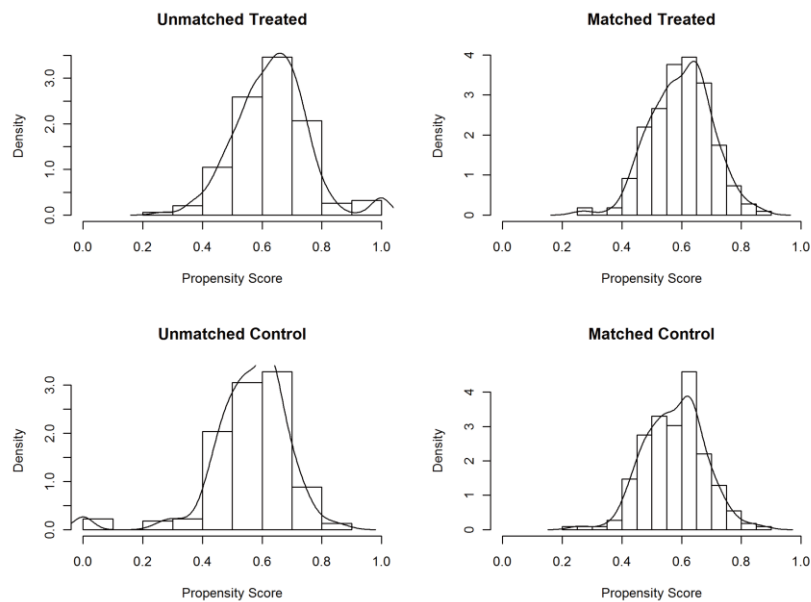

**Supplementary Figure 4.** Histograms of the propensity score in the original short interval group and long interval group patients and histograms of the propensity score in the matched patients.

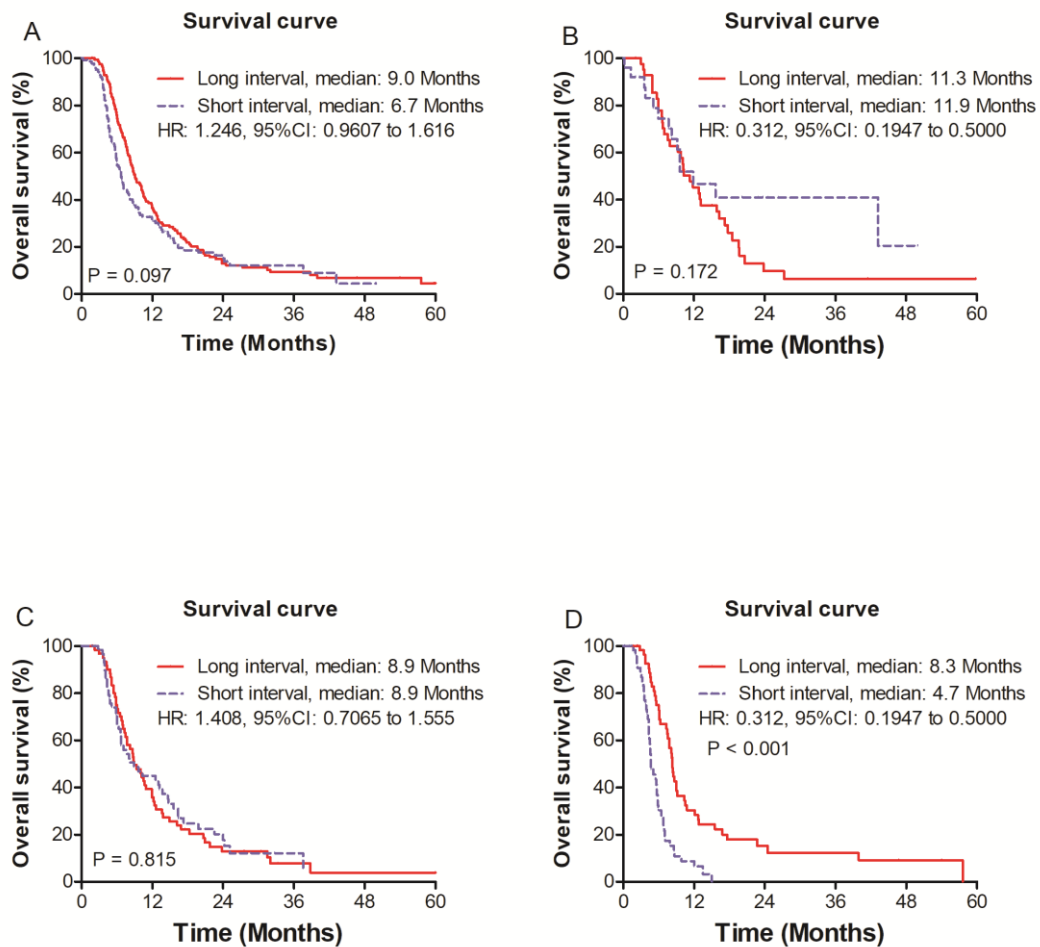

**Supplementary Figure 5.** Kaplan-Meier survival curves of Long- and short-interval in matched patients and treated with only two sessions of TACE: (A) Overall survival for Long- and short-interval in matched patients and treated with only two sessions of TACE, (B-D) for BCLC-A, -B and -C stage in matched patients and treated with only two sessions TACE.
